# Supplementary material for: Transport and degradation of perchlorate in deep vadose zone: implications from direct observations during bioremediation treatment
Source: Copernicus journal article supplement (doi:10.5194/hess-2016-663), 2017-01-23
Supplement: Supplementary file [file hess-2016-663-AC1-supplement.pdf]

1 Reply to reviewer #1 comments on the manuscript:

2 **Transport and degradation of perchlorate in deep vadose zone: implications from direct**  
3 **observations during bioremediation treatment**

4 We thank the reviewer for his constructive review and intend to address all of his comments. We  
5 would like to state that we are specifically encouraged by his statement “*The presented topic is*  
6 *of relevance for many sites worldwide, polluted with different chemicals which can be*  
7 *deactivated by microbial processes. The specific challenge of this approach was the location of*  
8 *the pollution within a deep vadose zone with complicated water flow conditions*”. In our view this  
9 is the main essence of this manuscript.

10 General comments

11 *Comment: Some context would be easier to understand if the order of subsections would be*  
12 *rearranged. For example: Section 4.3 explains why the different treatments for the experiments*  
13 *were chosen, because the infiltration depth was not sufficient in the beginning and the*  
14 *concentration of ethanol was too low during the first experiment. It would be good to have this*  
15 *information already in the beginning before the results of perchlorate transformation are shown*  
16 *and discussed. The same is true for the presentation of bromide tracer behavior (in the*  
17 *beginning of section 4.4) which again explains the experimental setup.*

18 Reply: We accept the comment. A section describing the overall structure of all three  
19 experiments will be added to the beginning of the result chapter. It will present the rationale  
20 behind all experiments and gives an overview of the measurements before detailed description  
21 of the various components.

22 Specific comments

23 *Comment: p. 5, l. 111: You state that perchlorate is slowly leached into the groundwater. Can*  
24 *you describe the behavior of this pollutant in the saturated zone? Is it reduced or only*  
25 *transported by groundwater flows?*

26 Reply: Perchlorate is well known to be fairly stable in groundwater. Its natural degradation is  
27 very limited and it is highly mobile. This has been presented in several publications (See for  
28 example a review paper by Bardiya et al. 2011, a chapter in a book Coates JD, Gu B. 2006, and  
29 perchlorate mobilization in this particular site Gal et al. 2009 (all of which are cited in this  
30 manuscript). The possibility of perchlorate reduction is depend in the groundwater redox  
31 conditions. We had reported in the past that groundwater is aerobic and thus natural  
32 degradation of perchlorate is not expected (Bernstein et al., 2010). Since our manuscript focus  
33 on the vadose zone where the hydro-chemical and biological conditions are substantially  
34 different from those occurring in groundwater we rather to focus on the vadose zone and not  
35 elaborate on the saturated part beyond the limited citations in the introduction chapter.

36 (Bernstein, A., Adar, E., Ronen, Z., Lowag, H., Stichler, W., & Meckenstock, R. U. (2010).  
37 Quantifying RDX biodegradation in groundwater using  $\delta^{15}\text{N}$  isotope analysis. Journal of  
38 contaminant hydrology, 111(1), 25-35.)

39 *Comment: p. 6, l. 147: What is the effect of these climatic conditions? Is the perchlorate only*  
40 *transported during the winter season and probably rises again during summer due to capillary*  
41 *action?*

42 Reply: The vadose zone is very thick (~40 m) and mostly sandy. As such capillary action is not  
43 relevant and will not impact more than the bottom ~1 m. The experimental area has been  
44 covered with a sealing liner to prevent air penetration and to promote reducing conditions in the  
45 vadose zone. As such the only source of water to the subsurface in this period is the water  
46 injected to the soil with the drip irrigation system under the surface cover. Accordingly the  
47 consequence of rain water infiltration is eliminated. In addition in such thick vadose zone even  
48 seasonal temperature fluctuations are limited to the upper 2 m (Rimon et al. 2011b, cited in the  
49 manuscript). As such we believe that the climate has only limited impact on the conditions in the  
50 subsurface.

51 *Comment: p. 11, l. 229: Please explain why no tracer was used in the second and third*  
52 *application.*

53 Reply: A single slug of tracer was used in in the beginning of the first experiment. It was  
54 designed to enable tracing of the wetting front that was introduced to the subsurface during the  
55 experiment. Application the tracer in the following experiment would have result in smearing the  
56 identity of the front and masking our capability to trace the moving water. In well-defined  
57 medium such as column experiment it is possible to differ between tracers applied in different  
58 stages. Yet we tend to believe that in natural heterogeneous system where water flow may be  
59 subjected to multi flow trajectories that may be activated and deactivated according to the  
60 hydraulic condition (see Dahan et al. 2009), application of the tracer in the following  
61 experiments would be a disadvantage.

62 *Comment: p. 12, l. 272 Can you exclude lateral fluxes of seepage water?*

63 Reply: We cannot absolutely exclude local limited of lateral fluxes. Nevertheless, creation of  
64 lateral flow in the unsaturated zone require, by definition, generation of saturated conditions that  
65 will create positive pressure which could overcome gravitational drainage. Up to date the  
66 vadose zone monitoring system has been installed in dozens of sites with different geological  
67 and hydrological conditions (See for example Dahan et al., 2007, Dahan et al. 2008, Rimon et al  
68 2007, 2011a, 2011b, Amiaz et al 2012 and others). In none of these sites we found evidences  
69 for creation of saturation conditions and thus creation of lateral flow in the vadose zone, even  
70 though some of the sites were under flooded conditions of high water head (Dahan et al 2007,  
71 2008), some with geological formations which are composed of clay interbeds that could  
72 potential create some kind of hydrological barrier and lateral flow. Since we did not find any  
73 indication for lateral flow in any of the other studies where water flow in the vadose zone was  
74 monitored we tend to believe that in this particular site lateral flow, if any, was very limited. In

75 this discussion we ignored lateral small scale capillary flow and lateral flow in purged aquifers.  
76 Both are not relevant to this site.

77 *Comment: p. 15, l. 326: Is the described successful reduction of perchlorate concentration the*  
78 *result of transport or reduction processes? Would it be a success if perchlorate is mainly*  
79 *transported by seepage water into deeper parts of the soil?*

80 *Comment: p. 16, l. 333: You mention mixed trends for both transformation and mobilization*  
81 *processes. Could you explain this conclusion more in detail?*

82 Reply to the two comment above (p.15 and p.16): This comment emphasize the greatest  
83 challenge we faced in this project. Can we absolutely state that the reduction in perchlorate  
84 concentration that we have observed in the upper parts of the unsaturated zone are the result of  
85 bio-degradation or simple down leaching with the percolating water. Moreover, we have to  
86 investigate this question in light of the fact that the concentration of perchlorate in some deep  
87 section only increased during the infiltration experiments. Throughout the paper we have  
88 discussed the potential degradation versus leaching from different perspective. In section 4.3  
89 we have analyzed the potential degradation of perchlorate to the availability of electron donor.  
90 Obviously under absence of available electron donor no perchlorate degradation will take place.  
91 Though we managed to introduce electron donor into the vadose zone it was limited to the top  
92 13 m. only there we found some reduction in perchlorate. In the rest of the profile we found no  
93 increase in available electron donor and in fact we also found no reduction perchlorate  
94 concentration. On the contrary in some places the concentration only increased which is an  
95 obvious indication to perchlorate mobilization with the percolating water. Further down in the  
96 manuscript in section 4.4 we discussed the potential degradation of perchlorate versus its  
97 transport through a comparison of the ethanol migration, which was consumed, versus the  
98 tracer, Br. Here we also compared the reduction in perchlorate with the variations in  
99 concentration of the degradation by-product chloride across the unsaturated zone and found a  
100 pronounced increase in Cl/Perchlorate only in the zones where we found available electron  
101 donor. All of these indicators provided hints to the question on the degradation vs leaching.

102 In the second part of the first comment the reviewer ask if “it be a success if perchlorate is  
103 mainly transported by seepage water into deeper parts of the soil”. This is a very important  
104 question that is the subject of several studies we are conducting now (See Avishai et al 2016.  
105 Journal of Hazardous Materials). Since we found that achieving “efficient” degrading conditions  
106 in deep vadose zone is limited and we found that perchlorate mobilization in the unsaturated  
107 zone is very high we are testing the possibility to leach the pollution down to the groundwater  
108 where it can be retrieved back for treatment on land surface.

109 *Comment: p. 17, l. 350: Probably the relation between ethanol concentration and DOC could be*  
110 *shown by means of a figure and a regression curve?*

111 Reply: As mentioned in p.17 lines 346-352, we found high correlation between ethanol and  
112 DOC. Even though ethanol is mineralized by perchlorate reducing bacteria, it may degraded  
113 first to acetate that also serve as energy for the degrading bacteria thus, DOC provide better

114 picture on the availability of electron donor in the soil pore water. Since it is all presented in the  
115 manuscript text we believe that adding this information in a figure is somewhat not necessary.  
116 The figure below display ethanol vs DOC in all water samples where both ethanol and DOC were  
117 measured

118

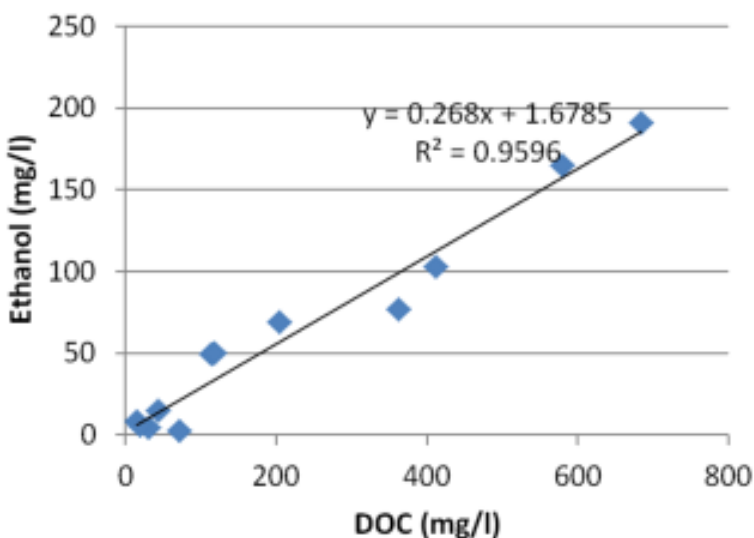

119

120 Figure 1. Ethanol VS DOC in all water samples where both were measured

121 *Comment: p. 21, fig. 8: Is the red graph an average for data of the period 1/3-11/4 2015 (1.5*  
122 *months)?*

123 Reply: The red graph is a combination of data obtained from two consequent sampling data.  
124 Due to a technical problem that was resulted in luck of samples from one of the dates it was  
125 necessary to integrate data from these two consequent dates.

126 *Comment: p. 22, l. 459: You end up with the conclusion that the entire column of perchlorate*  
127 *was pushed downwards by the infiltrating water. Thus, the problem is mainly shifted to the*  
128 *groundwater. Could you discuss the overall success of the presented remediation experiment*  
129 *against this background?*

130 Reply: See reply to second part of comment p.15 in lines 89-95 of this document

131 Technical corrections

132 *Comment: References: Bauterse et al (2000) and Stumpp et al. (2009) are not mentioned in the*  
133 *text*

134 Reply: Will be corrected it in the revised manuscript

135 *Comment: Fig. 3: the legend is missing*

136 Reply: Will be corrected in the revised manuscript

137 *Comment: Fig. 4/5: explain the meaning of the red arrows.*

138 Reply: The red arrows emphasize the variation in perchlorate concentration in time. In Figure 4  
139 it describe perchlorate reduction in the upper 13 m while in figure 5 the arrow emphasize the  
140 increase in perchlorate concentration with time in the deeper section of the vadose zone.

141 Elaboration on the meaning of the arrows will be added to the figure captions.
